# Supplementary material for: Connectome-Scale Assessments of Functional Connectivity in Children with Primary Monosymptomatic Nocturnal Enuresis
Source: Hindawi journal article supplement (doi:10.1155/2015/463708), 2015-01-01

**Supplementary materials 2:** The illustration of area under curve (AUC) for network metrics. The AUC for a network metric Y which was calculated over the sparsity threshold range of  $S_1$  to  $S_n$  with interval of  $\Delta S$ , was computed as  $Y^{AUC} = \sum_{k=1}^{n-1} [Y(S_k) + Y(S_{k+1})] \times \Delta S / 2$ . In the current study,  $S_1 = 0.10$ ,  $S_n = 0.34$  and  $\Delta S = 0.01$  (Figure S1).

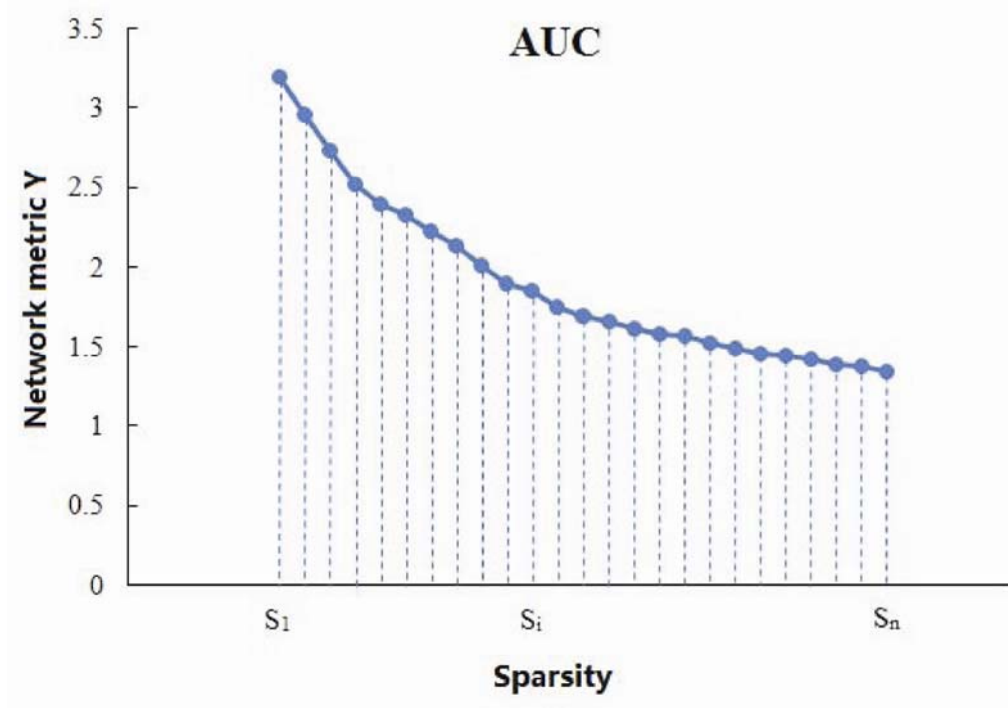

Supplement: f1 [file 463708.f1.zip]
