# Supplementary material for: Connectome-Scale Assessments of Functional Connectivity in Children with Primary Monosymptomatic Nocturnal Enuresis
Source: Biomed Res Int. 2015 Jun 9;2015:463708. doi: 10.1155/2015/463708 (PMC4477104; doi:10.1155/2015/463708)
Supplement: Supplementary file 1 — Supplementary Material 1 is the clinical data collected from the patient group, including bed-wetting frequency, bladder volume, frequency of waking up for voluntary voiding, and so on. Supplementary Material 2: The illustration of area under curve (AUC) for network metrics. [file 463708.f1.zip]

Archive with 2 entries (2 files):
- suppl 1.doc
- suppl 2.pdf
